# Supplementary material for: Characterizing RNA stability genome-wide through combined analysis of PRO-seq and RNA-seq data
Source: PubMed Central journal article supplement (PMC7885420; doi:10.1186/s12915-021-00949-x), 2021-02-15
Supplement: 12915_2021_949_MOESM1_ESM.pdf [file 12915_2021_949_MOESM1_ESM.pdf]

**Supplemental Table 1: Summary of Advantages of Method**

| <i>Advantage</i>                | <i>Description</i>                                                                                                                                                                                                                                                   |
|---------------------------------|----------------------------------------------------------------------------------------------------------------------------------------------------------------------------------------------------------------------------------------------------------------------|
| Efficiency of time and material | No need to collect data for full time course, reducing the number of experiments and the amounts of material needed                                                                                                                                                  |
| Reuse of existing data          | RNA-seq and PRO-seq data sets can be decoupled. As a result, existing RNA-seq and/or PRO-seq data for adequately matched cells can be reused.                                                                                                                        |
| Other applications of data      | Newly collected RNA-seq or PRO-seq data can be used for other purposes, e.g., analysis of proximal promoter pausing or identification of active enhancers                                                                                                            |
| Extension to tissue samples     | Can be applied to tissue samples using ChRO-seq                                                                                                                                                                                                                      |
| High sensitivity                | Exploits high sensitivity of PRO-seq to noncoding and other low-abundance transcripts                                                                                                                                                                                |
| Nondisruptive                   | Less disruptive to the biological processes under study than most drugs used for transcriptional inhibition and metabolic labeling. PRO-seq captures the positions of engaged RNA polymerases under the cellular conditions that exist when the experiment commences |
| Continual improvement           | PRO-seq protocol is continually being improved. Current improvements allow PRO-seq libraries to be prepared in one day with comparable difficulty to enriching RNA-seq libraries for 4sU (Kim et al. 2020)                                                           |
