# Supplementary material for: Characterizing RNA stability genome-wide through combined analysis of PRO-seq and RNA-seq data
Source: PubMed Central journal article supplement (PMC7885420; doi:10.1186/s12915-021-00949-x), 2021-02-15
Supplement: 12915_2021_949_MOESM2_ESM.pdf [file 12915_2021_949_MOESM2_ESM.pdf]

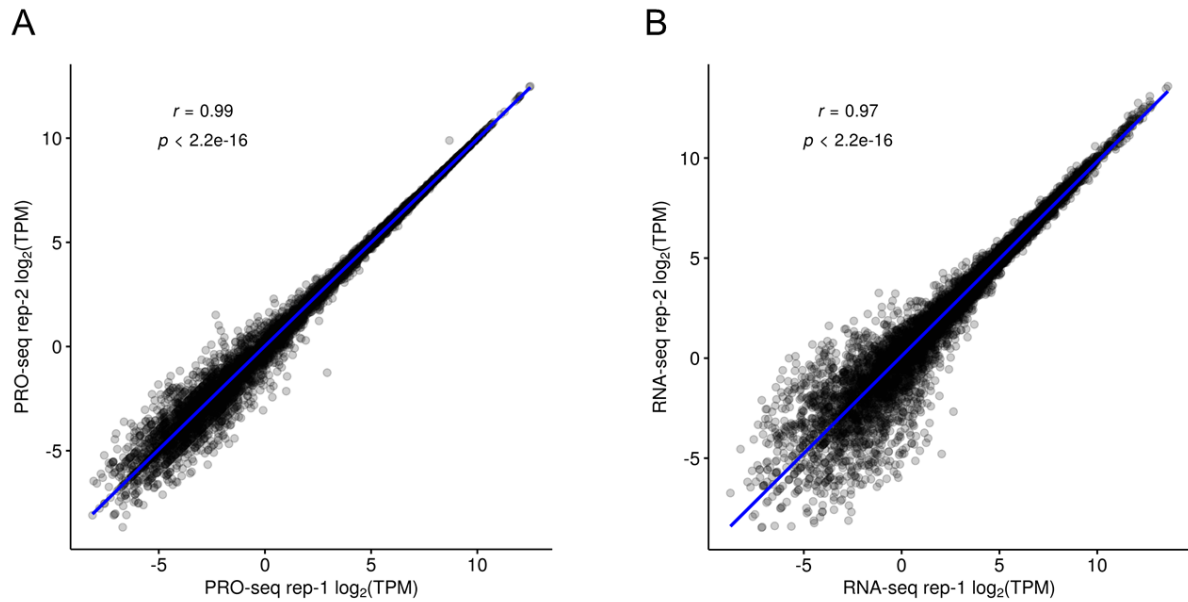

**Supplemental Figure 1. Correlation of PRO-seq and RNA-seq replicates in K562 cells.** (A) Pearson's correlation coefficient  $r$  for two replicates assayed by PRO-seq. (B) Pearson's correlation coefficient  $r$  for two replicates assayed by RNA-seq. In both cases, genes without reads in one or more replicates were excluded.

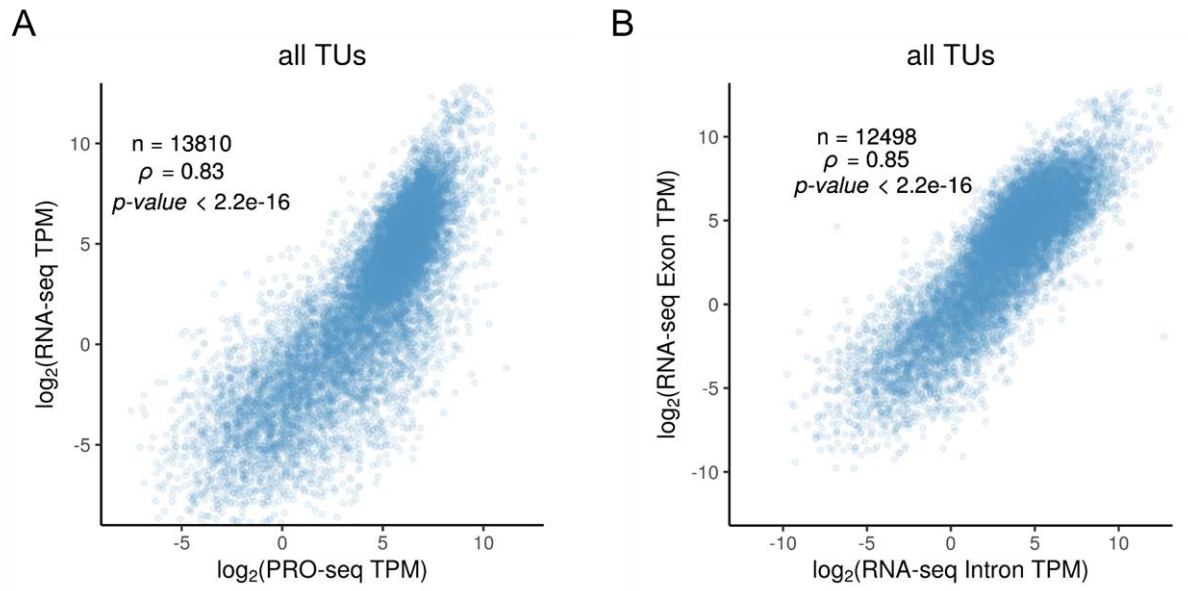

**Supplemental Figure 2. Correlation of exonic reads from RNA-seq with either PRO-seq or intronic reads.** (A) PRO-seq vs. exonic reads from RNA-seq. (B) Intronic reads vs. exonic reads from RNA-seq. Results are for all transcription units (TUs).  $\rho$  = Spearman's rank correlation coefficient.

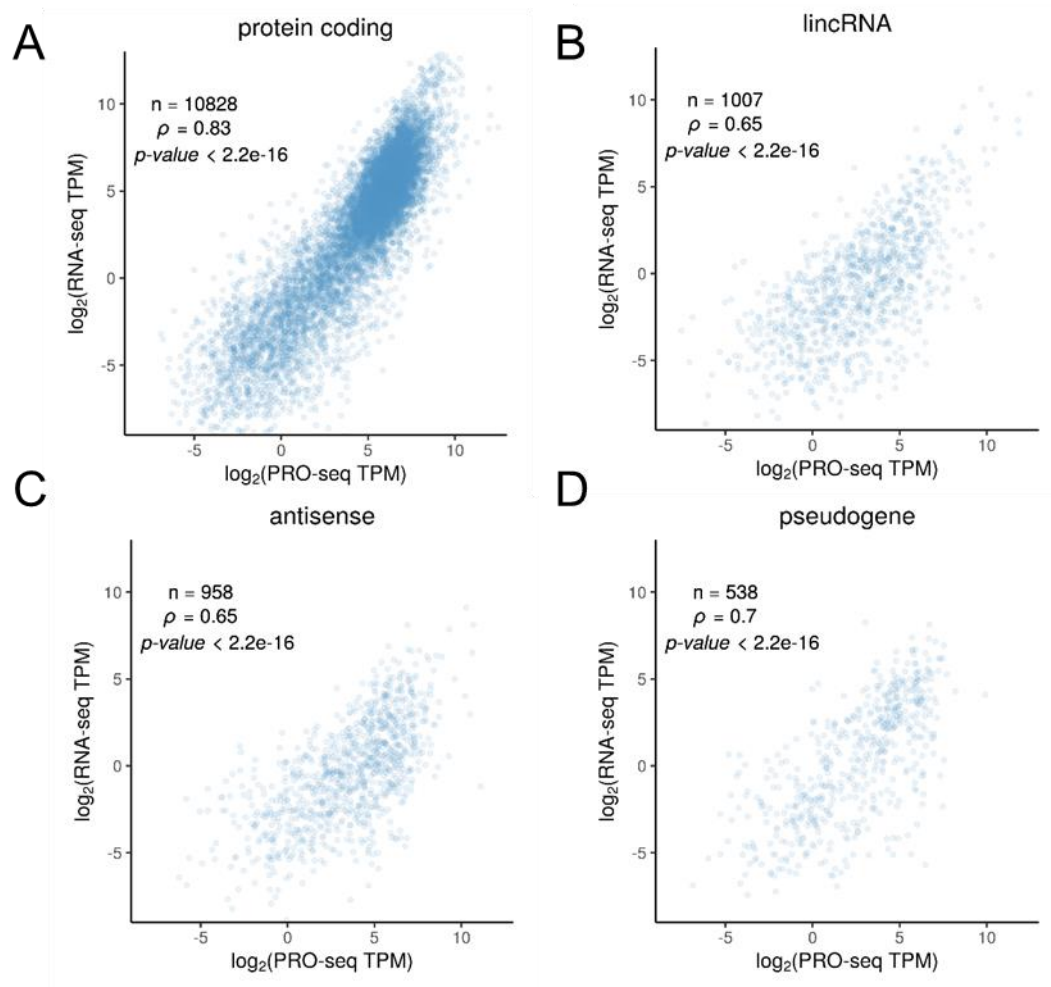

**Supplemental Figure 3. Scatter plots of PRO-seq vs. RNA-seq for intron-containing transcription units in K562 cells.** Panels describe (A) protein-coding mRNAs (B) intergenic lincRNAs (C) intragenic antisense non-coding genes, and (D) pseudogenes, all from GENCODE. For each plot, the number of genes analyzed is shown together with Spearman's rank correlation coefficient ( $\rho$ ).

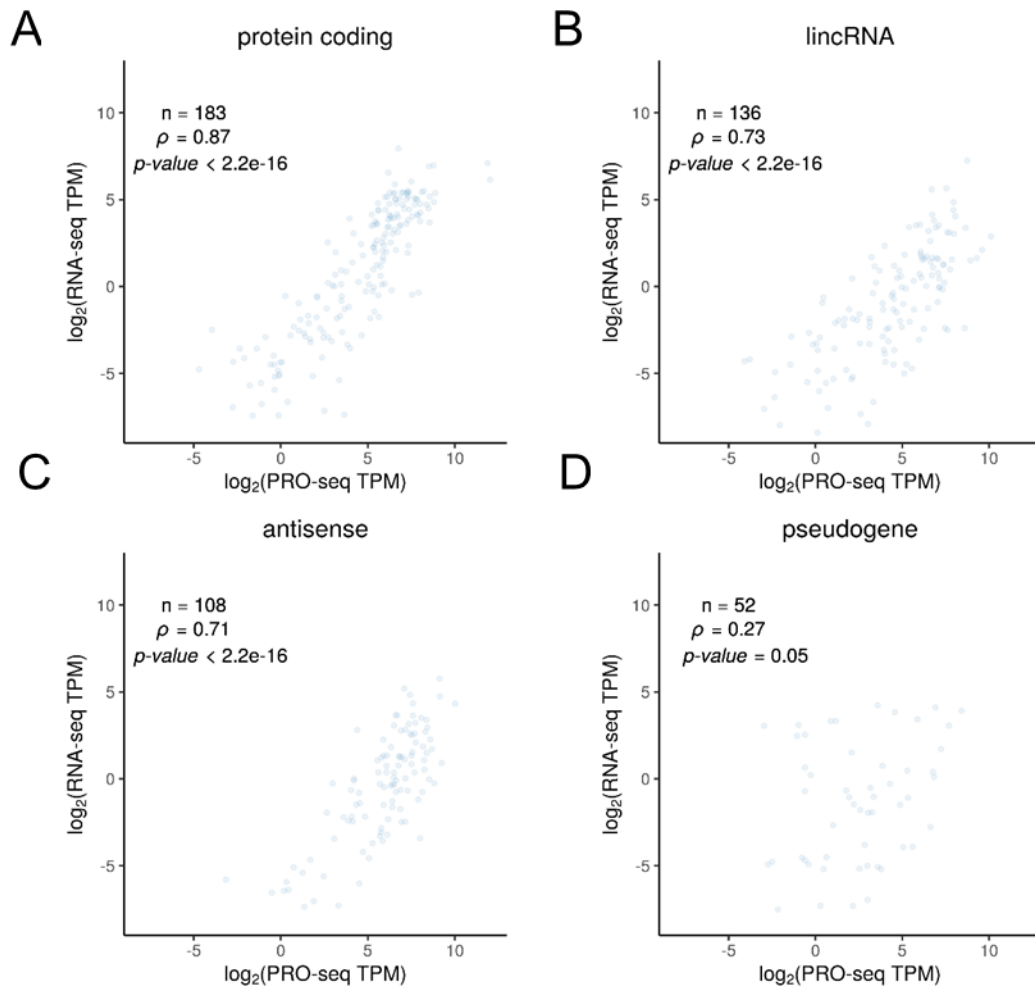

**Supplemental Figure 4. Scatter plots of PRO-seq vs. RNA-seq for intron-less transcription units in K562 cells.** Panels describe (A) protein-coding mRNAs (B) intergenic lincRNAs (C) intragenic antisense non-coding genes, and (D) pseudogenes, all from GENCODE. For each plot, the number of genes analyzed is shown together with Spearman's rank correlation coefficient ( $\rho$ ).

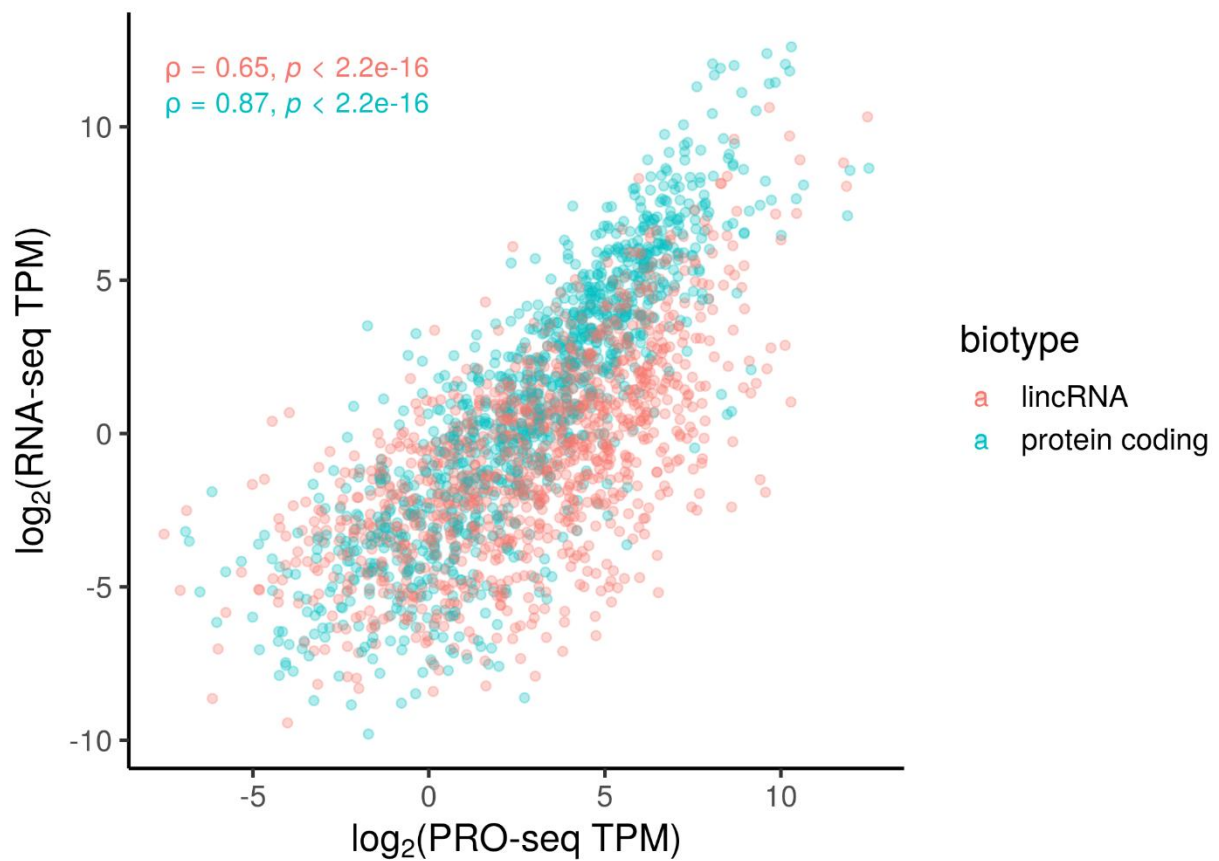

**Supplemental Figure 5. Scatter plots of PRO-seq vs. RNA-seq for lincRNAs and protein-coding mRNAs in K562 cells after matching by PRO-seq signal.** Subsampling was applied to obtain equal numbers of protein-coding mRNA and intergenic lincRNA ( $n = 1143$ ) approximately matched by PRO-seq abundance (in TPM).

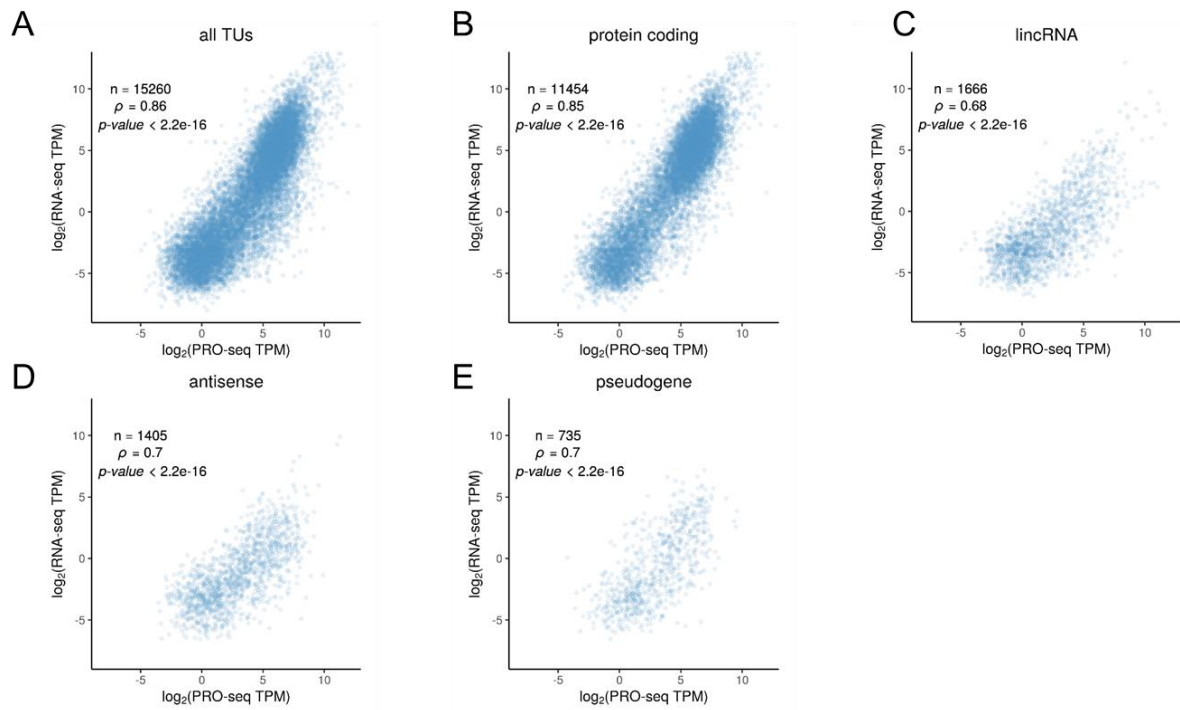

**Supplemental Figure 6. Scatter plots of PRO-seq vs. RNA-seq for transcription units in K562 cells, based on newly collected data for this study.** Panels describe (A) all annotated TUs, (B) protein-coding mRNAs, (C) intergenic lincRNAs, (D) intragenic antisense non-coding genes, and (E) pseudogenes. For each plot, the number of genes analyzed is shown together with Spearman's rank correlation coefficient ( $\rho$ ).

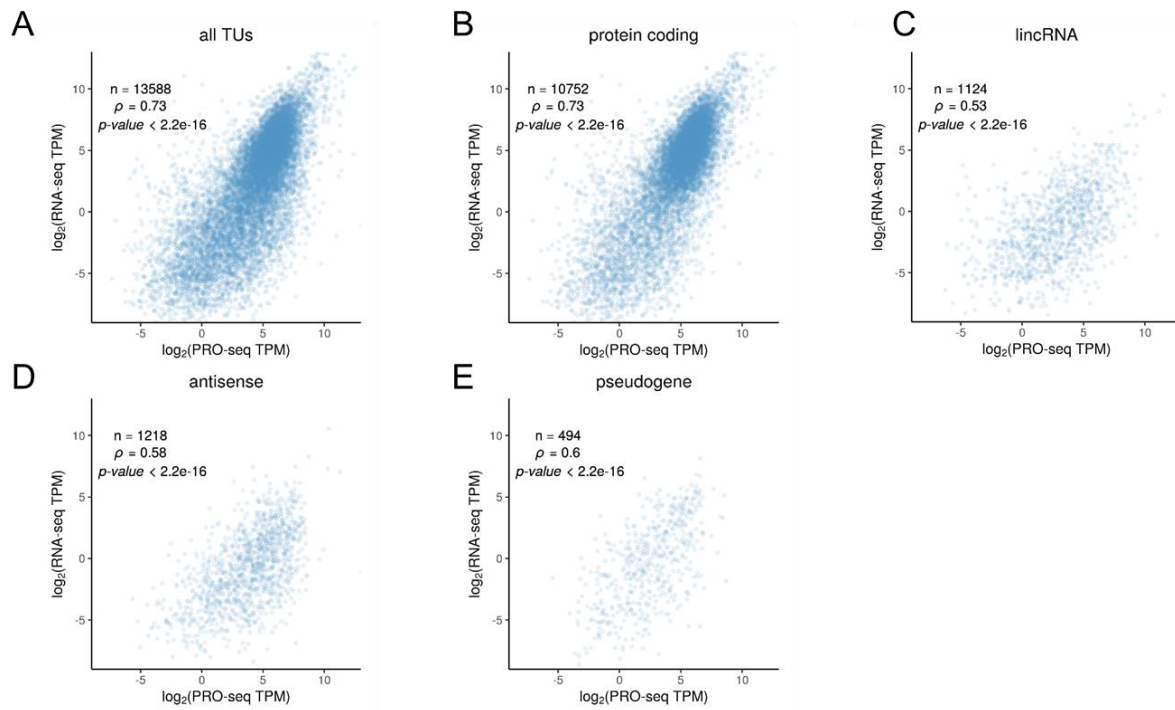

**Supplemental Figure 7. Scatter plots of PRO-seq vs. RNA-seq for transcription units in HeLa cells.** Panels describe (A) all annotated TUs, (B) protein-coding mRNAs, (C) intergenic lincRNAs, (D) intragenic antisense non-coding genes, and (E) pseudogenes. For each plot, the number of genes analyzed is shown together with Spearman's rank correlation coefficient ( $\rho$ ).

**A**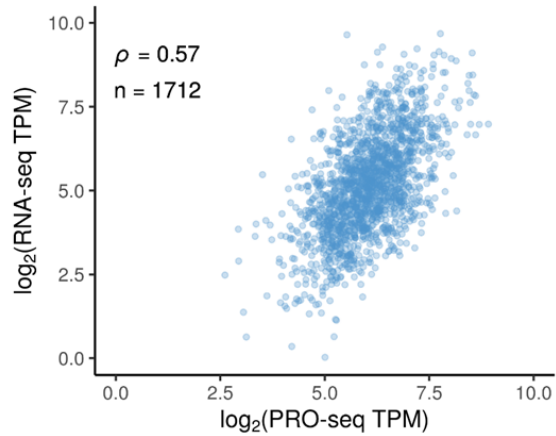**B**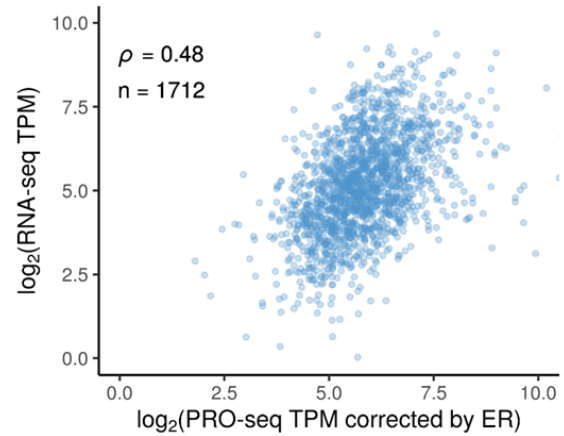

**Supplemental Figure 8. Scatter plots of PRO-seq vs. RNA-seq for mRNAs and lincRNAs in K562 cells before and after correcting for elongation rate.** (A) With uncorrected PRO-seq estimates. (B) With corrected PRO-seq estimates. Both plots describe  $n=1712$  genes for which estimates of elongation rate were available from Veloso et. al.. Corrections in (B) were made by multiplying the PRO-seq TPM by the estimated elongation rate per gene (as described in the **Methods**).



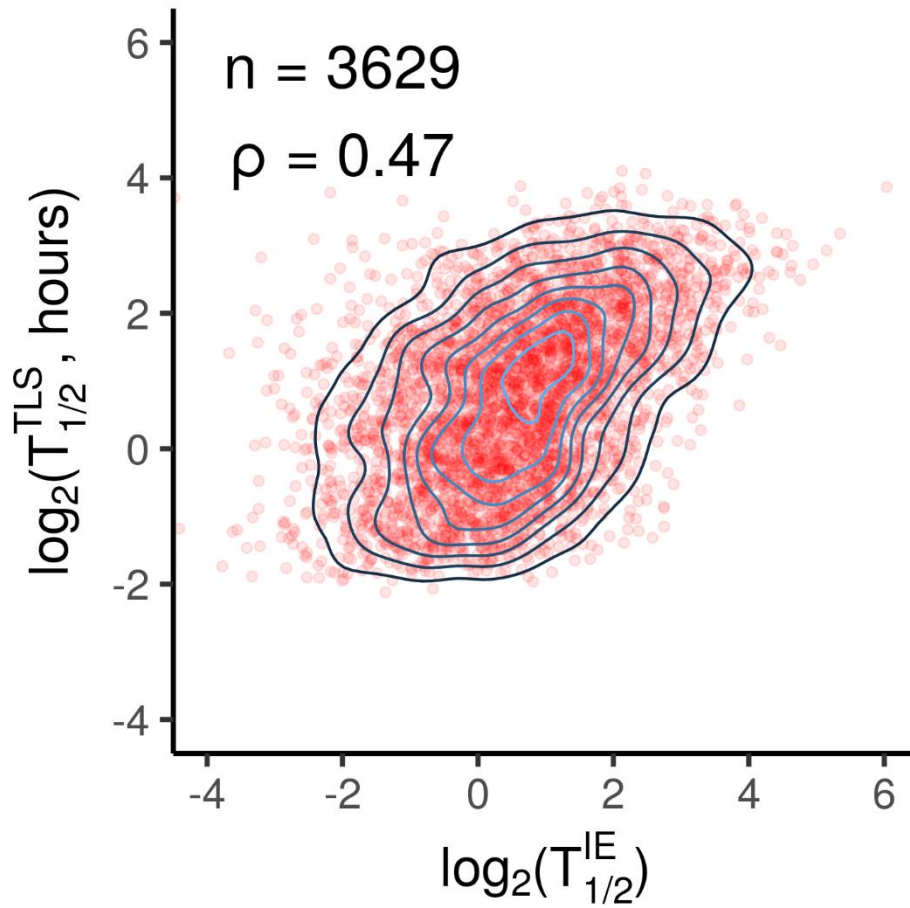

**Supplemental Figure 9. Intronic half-life vs. TimeLapse-seq half-life.** Scatter plot with density contours for  $\log_2(\text{half-lives})$  estimated by the intronic/exonic RNA-seq method ( $T_{1/2}^{IE}$ , x-axis) vs. those estimated by TimeLapse-seq ( $T_{1/2}^{TLS}$ , y-axis) ( $n = 3629$ ).  $\rho$  = Spearman's rank correlation coefficient.

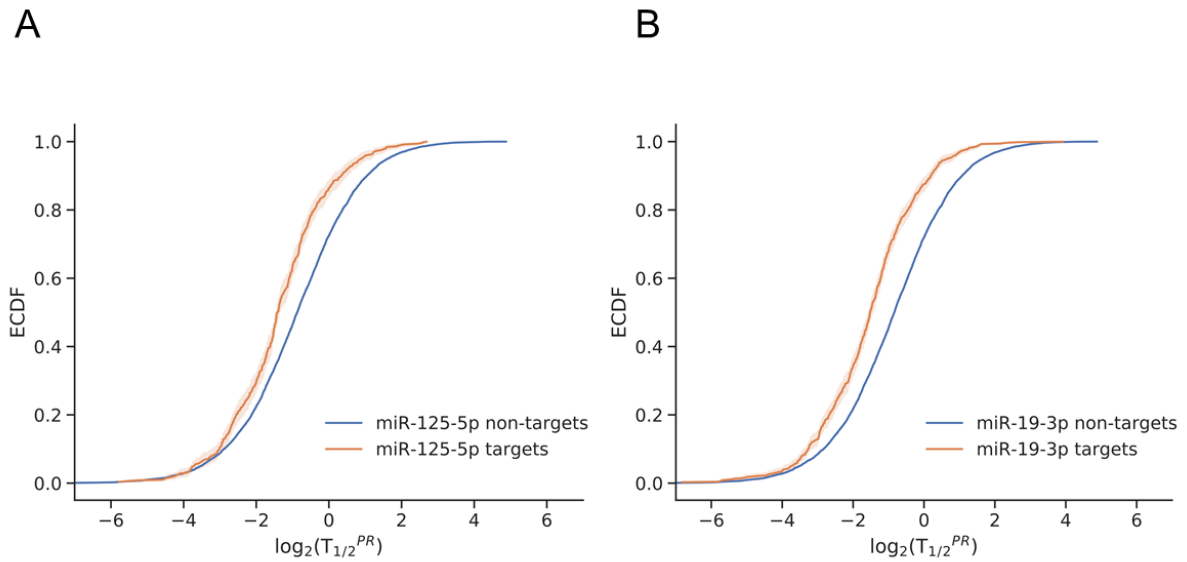

**Supplemental Figure 10. Empirical cumulative distribution functions (eCDFs) for estimated half-lives of predicted targets of miR-125-5p and miR-19-3p vs. non-targets.** The numbers of miR-125-5p targets and non-targets are 500 and 7662 ( $p = 5.09e-15$ , K-S test), respectively. The numbers of miR-19-3p targets and non-targets are 708 and 7454 ( $p = 1.49e-30$ , K-S test), respectively. Shading indicates 95% confidential intervals as estimated from 1000 bootstrap replicates.

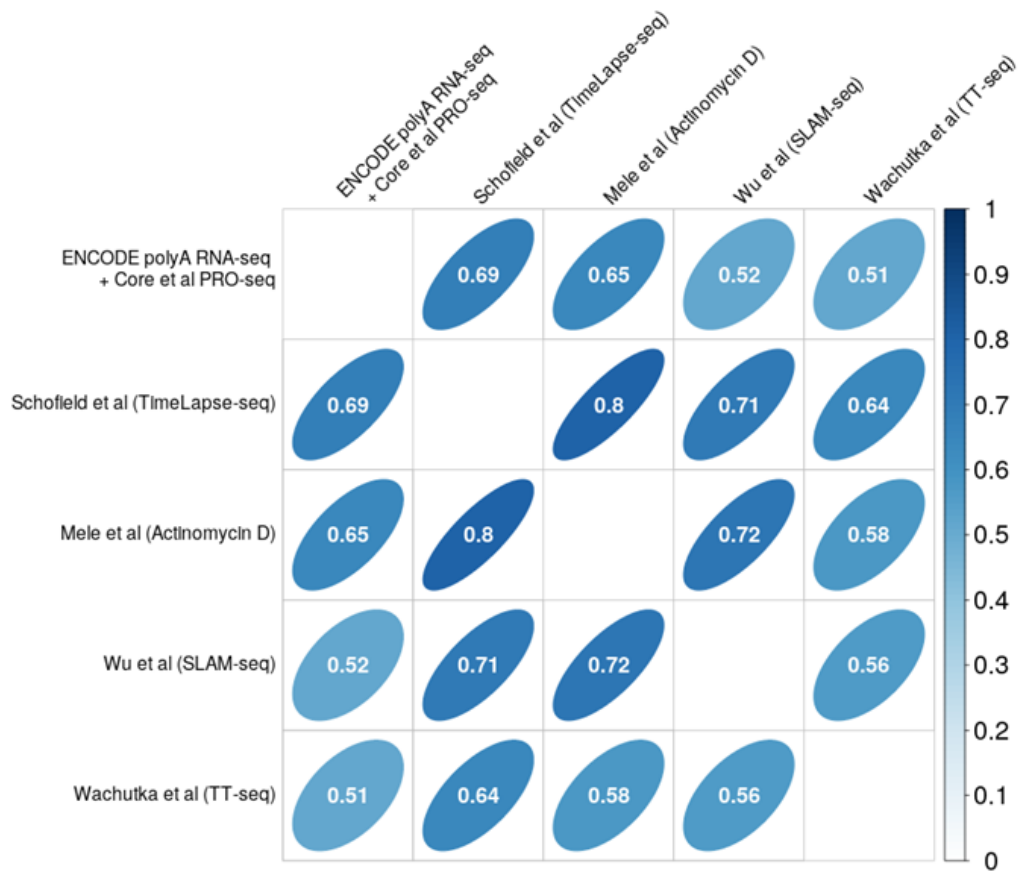

**Supplemental Figure 11. Correlation of estimated RNA half-lives under various methods.** Methods include our own, TimeLapse-seq, the method of Mele et al., SLAM-seq, and TT-seq. All comparisons are based on a common set of protein-coding genes to which all methods had been applied ( $n = 3449$ ). The number in each cell of the matrix and the corresponding color represent Spearman's rank correlation coefficient ( $\rho$ ) for each pairwise comparison.

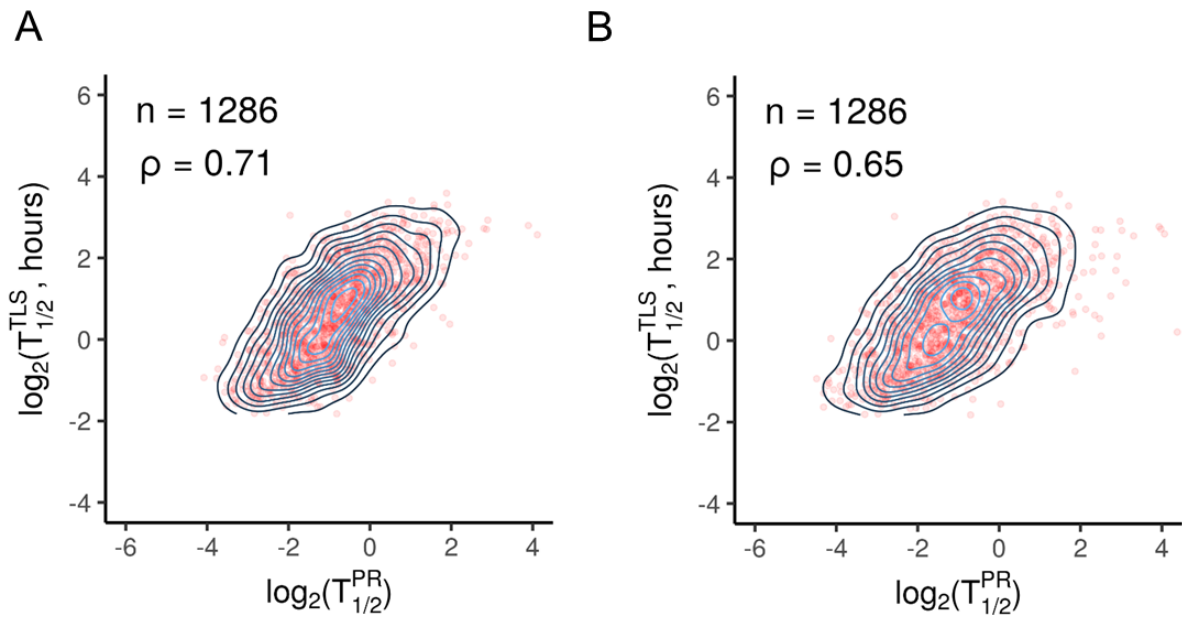

**Supplemental Figure 12. Correlation of PRO-seq-based half-lives ( $T_{1/2}^{PR}$ , x-axis) vs. estimates from TimeLapse-seq ( $T_{1/2}^{TLS}$ , y-axis) after correcting for elongation rate.** Elongation rates were obtained from Veloso et. al.. (A) half-life without correction (B) half-life with correction. The correction was performed as described in **Supplementary Fig. 8** and **Methods**.  $\rho$  = Spearman's rank correlation coefficient.

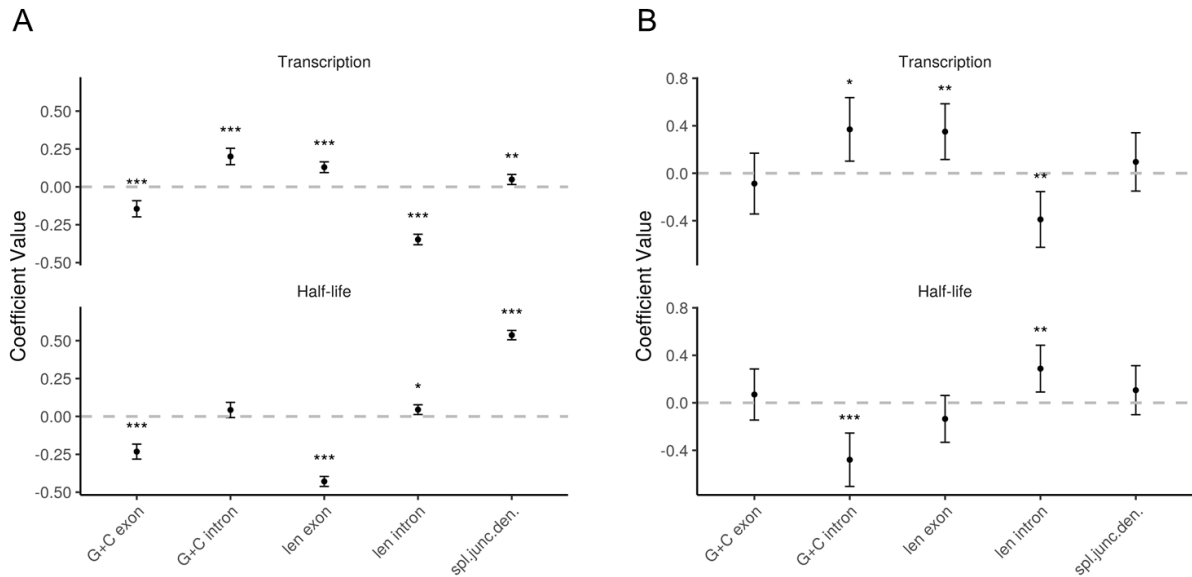

**Supplemental Figure 13. SEM results for features of intron-containing transcription units in K562 cells.** (A) Results for protein-coding mRNAs ( $n = 8428$ ). (B) Results for lincRNA ( $n = 337$ ). Features considered for each TU: G+C exon—GC content in exons; G+C Intron—G+C content in introns; len exon—Total exon length; len intron—Total intron length; spl. junction den.—Number of splice junctions divided by mature RNA length. Error bars represent  $\pm 1.96$  standard error, as calculated by the ‘lavaan’ R package. Significance (from Z-score): \*  $p < 0.05$ ; \*\*  $p < 0.005$ ; \*\*\*  $p < 0.0005$ .

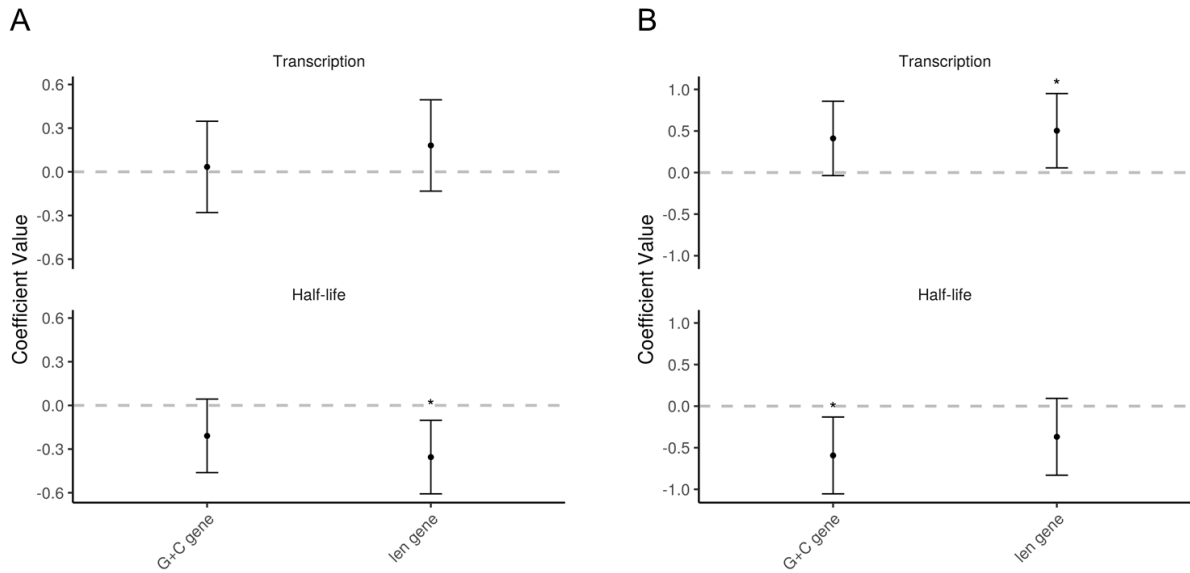

**Supplemental Figure 14. SEM results for features of intron-less transcripts in K562 cells.** (A) Results for protein-coding mRNAs ( $n = 108$ ). (B) Results for lincRNAs ( $n = 55$ ). Features considered for each TU: len gene—TU length; G+C gene—G+C content. Error bars represent  $\pm 1.96$  standard error, as calculated by the 'lavaan' R package. Significance (from Z-score): \*  $p < 0.05$ ; \*\*  $p < 0.005$ ; \*\*\*  $p < 0.0005$ .

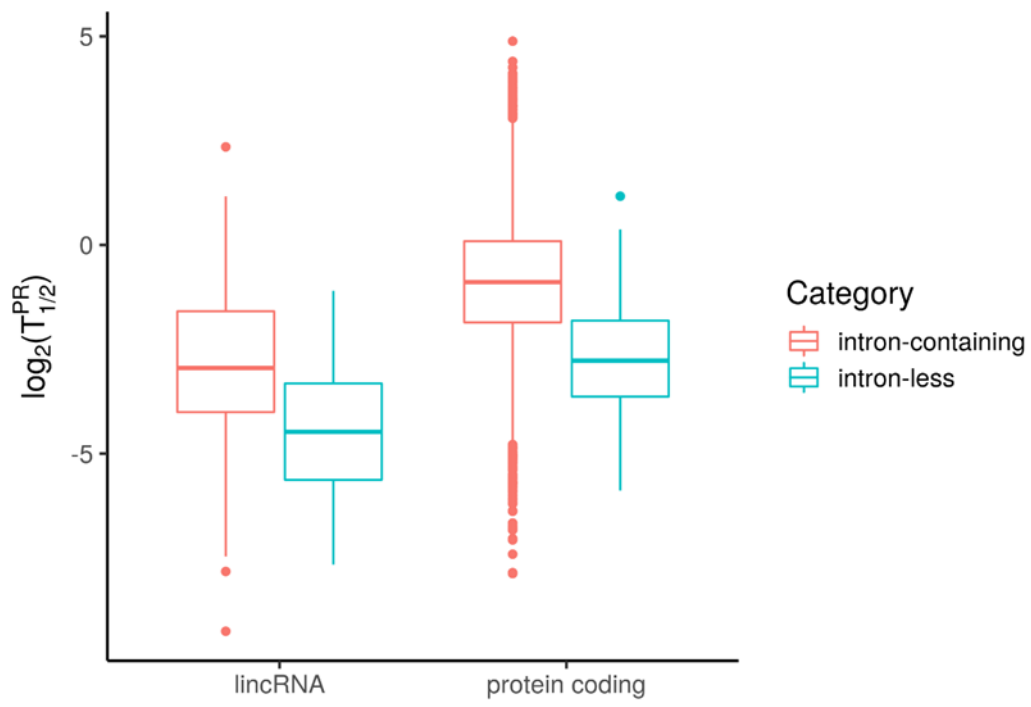

**Supplemental Figure 15. Estimated half-lives for intron-containing and intron-less transcription units.** Results for lincRNAs are shown on the *left* and results for protein-coding mRNAs are shown on the *right*.

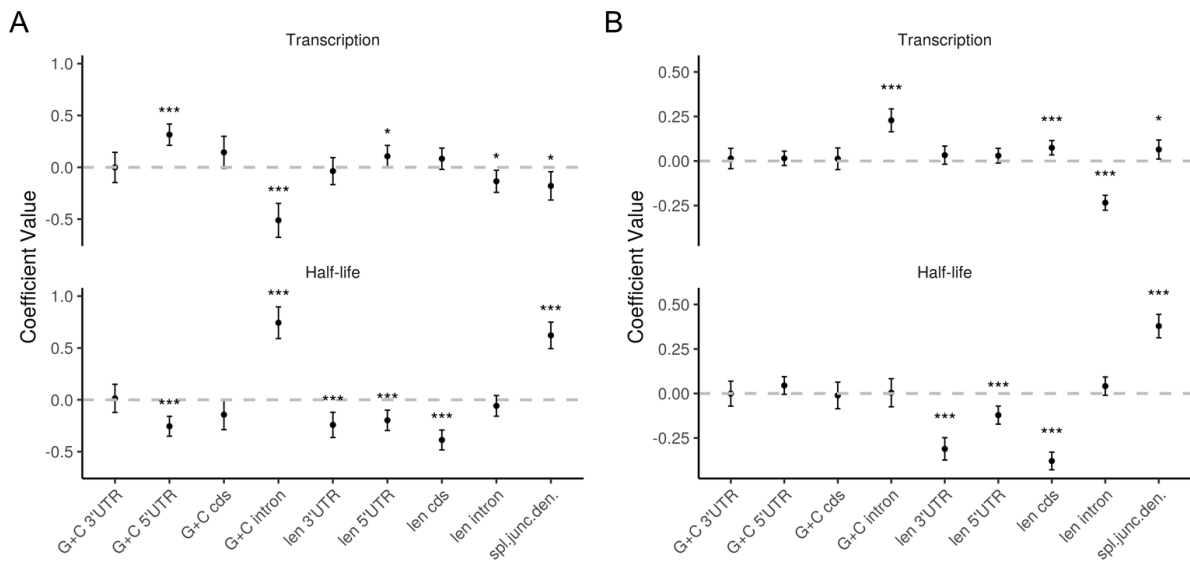

**Supplemental Figure 16. SEM results for features of intron-containing transcripts in K562 cells, with and without a correction for elongation rate.** (A) Results based on estimates of half-life that were explicitly corrected for elongation rates obtained from Veloso et al. as described in the **Methods**. (B) Results for the same set of genes without the correction for elongation rate. In both analyses, we used  $n = 1429$  genes for which elongation-rate estimates were available.



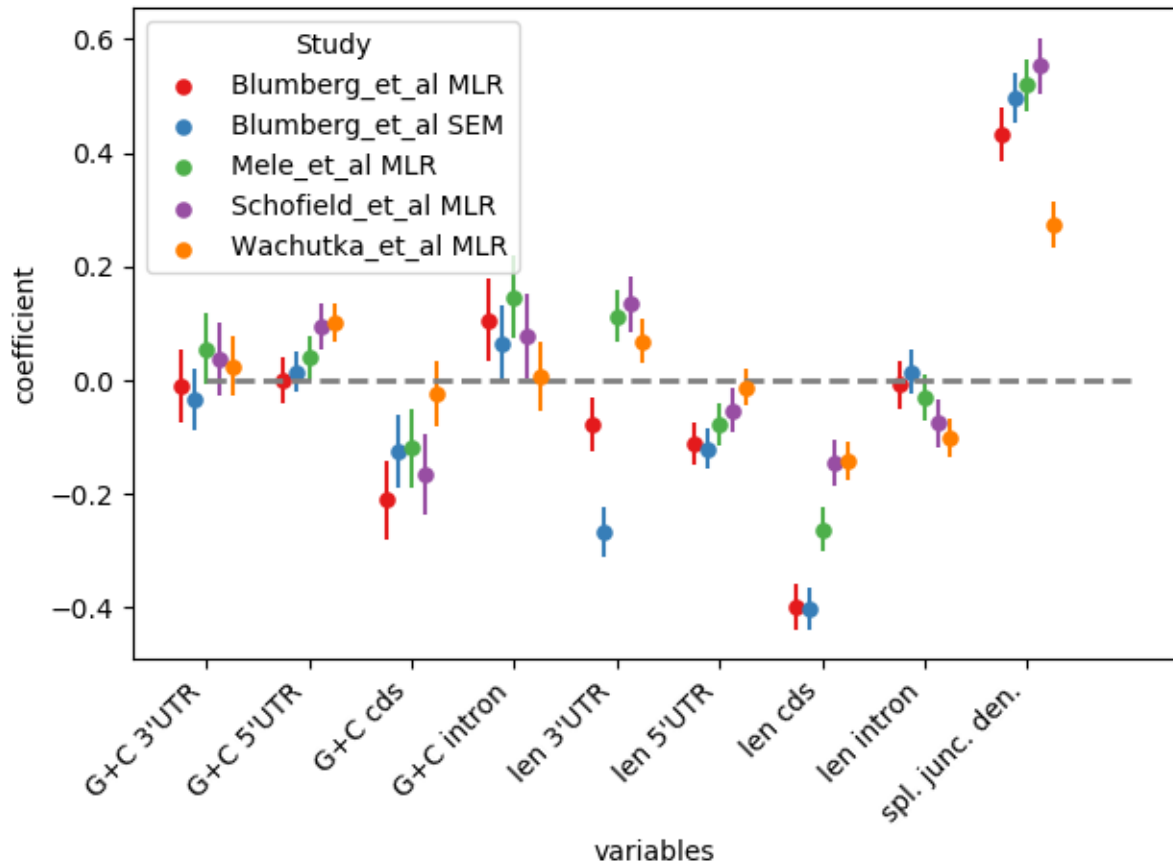

**Supplemental Figure 17. Multiple linear regression (MLR) for features of transcription units versus RNA stability in K562 cells.** The same analysis was repeated with half-life estimates from our study (Blumberg et al. MLR), the study of Mele et al., TimeLapse-seq (Schofield et al.), and TT-seq (Wachutka et al.). For comparison, we also show the coefficients from our Structural Equation Modeling analysis (Blumberg et al. SEM). Results are based on  $n=3418$  genes to which all methods had been applied.





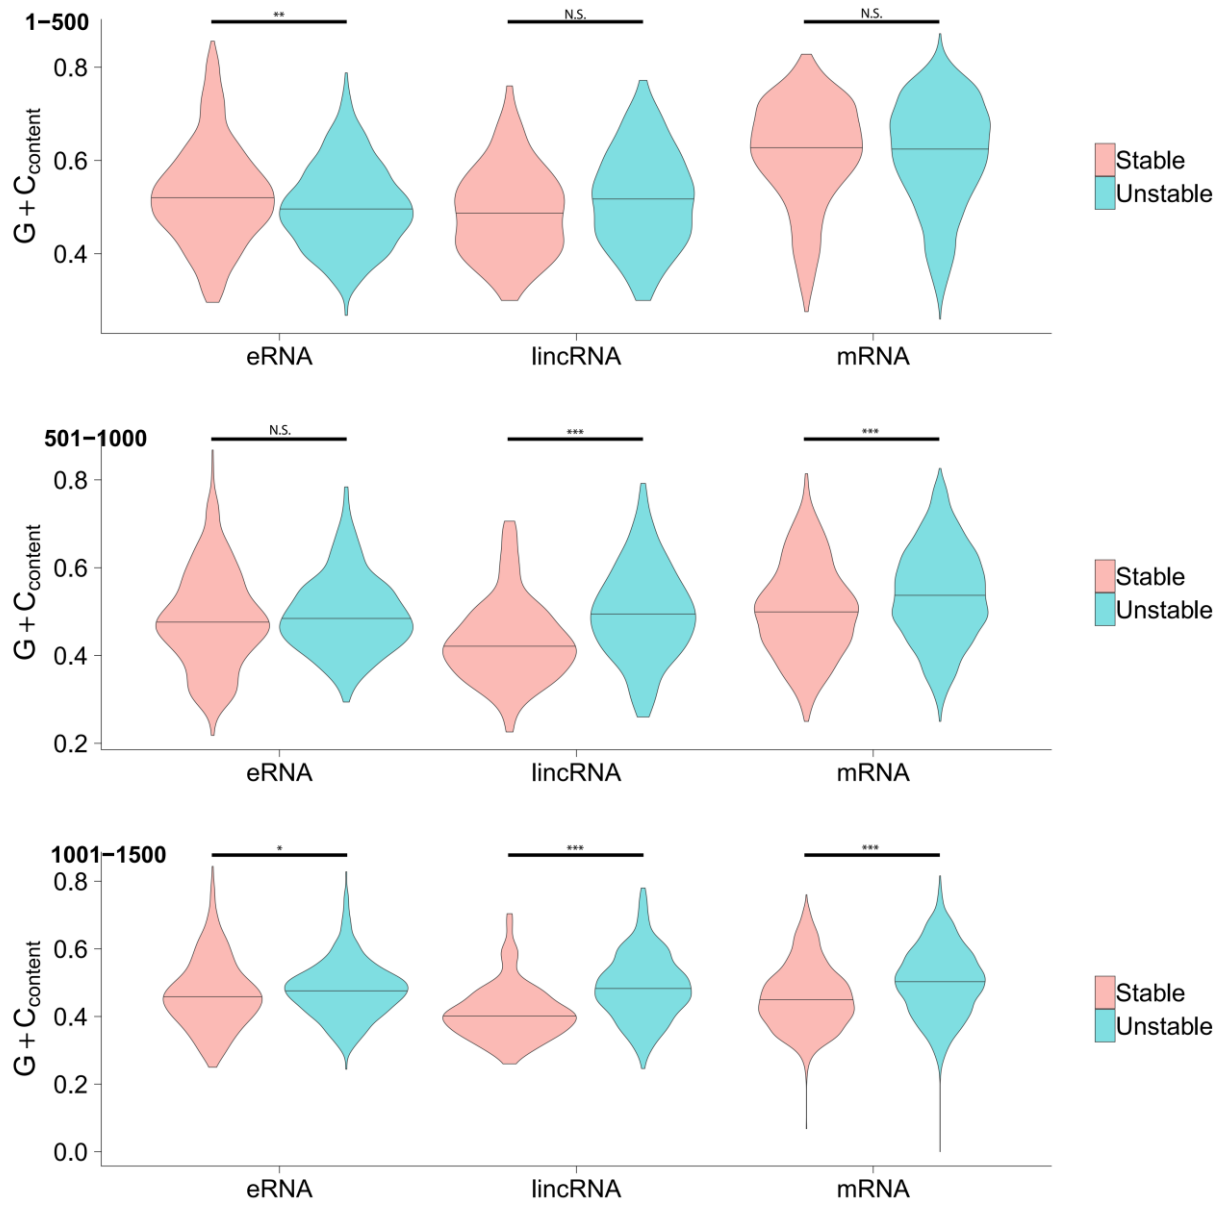

**Supplemental Figure 20. G+C content in intervals downstream of the TSS for various classes of transcription units.** Results are shown for intervals 1-500bp (*top*), 501-1000bp (*middle*), and 1001-1500bp (*bottom*) downstream of the TSS. \*  $p < 0.01$ ; \*\*  $p < 0.001$ ; \*\*\*  $p < 0.0001$ , Mann–Whitney U test. enhancer RNAs (eRNA, stable:  $n=510$ ; unstable:  $n=510$ ), lincRNAs (stable:  $n=91$ ; unstable:  $n=198$ ) and mRNAs (stable:  $n=919$ ; unstable:  $n=2146$ ).



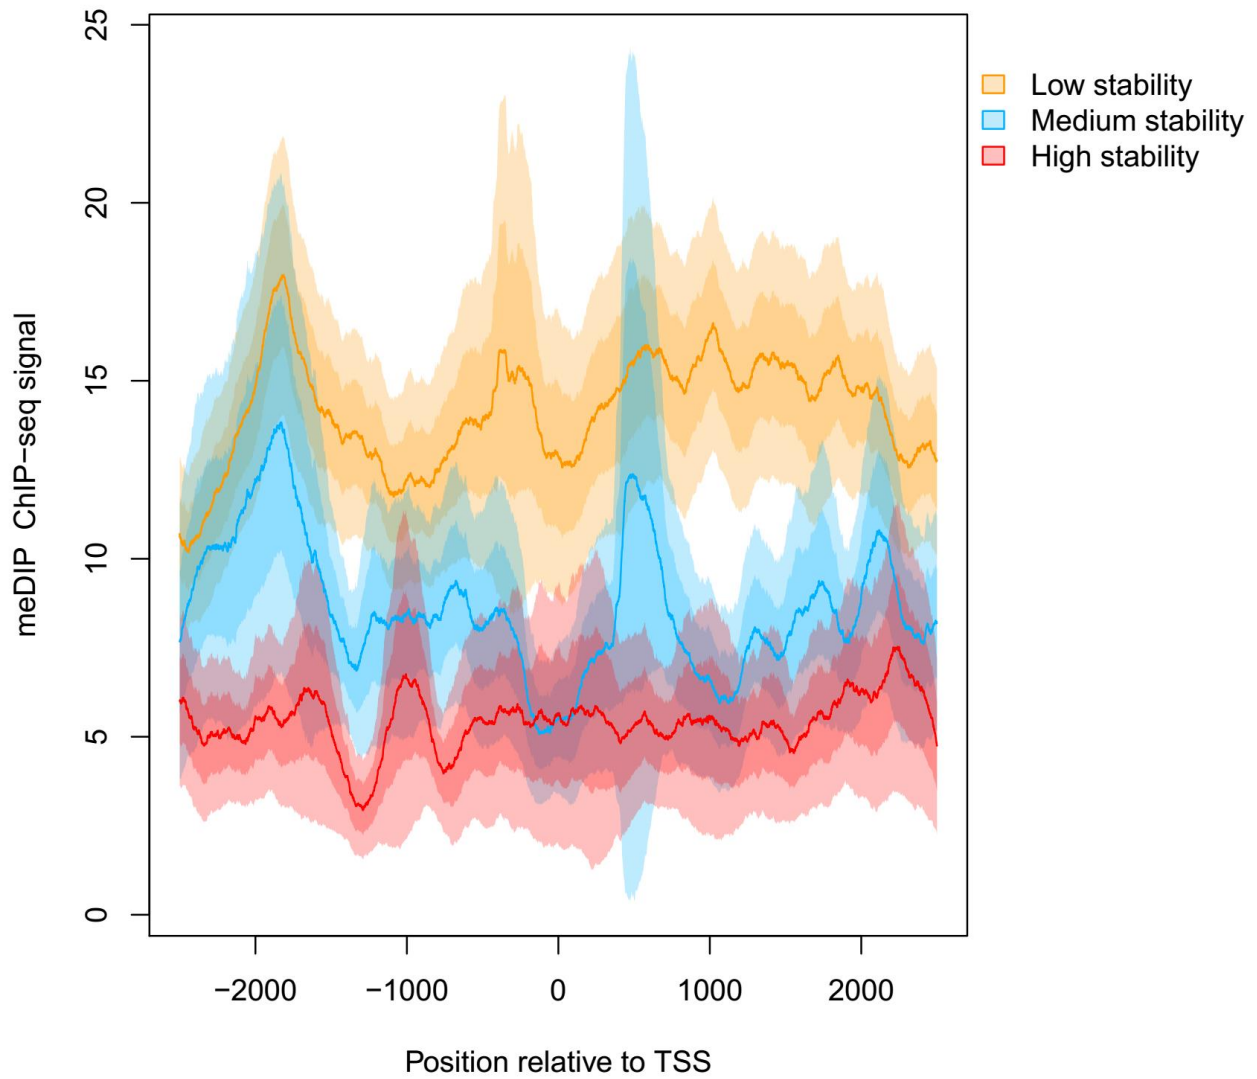

**Supplemental Figure 22. DNA methylation in lincRNAs of various stability levels.** Plots represent the average signal of the methylated DNA immunoprecipitation (MeDIP-seq) assay in K562 cells in three sets of lincRNAs: Low stability (lowest 20% by estimated half-life); Medium stability (40%-60%); and High stability (highest 20%).

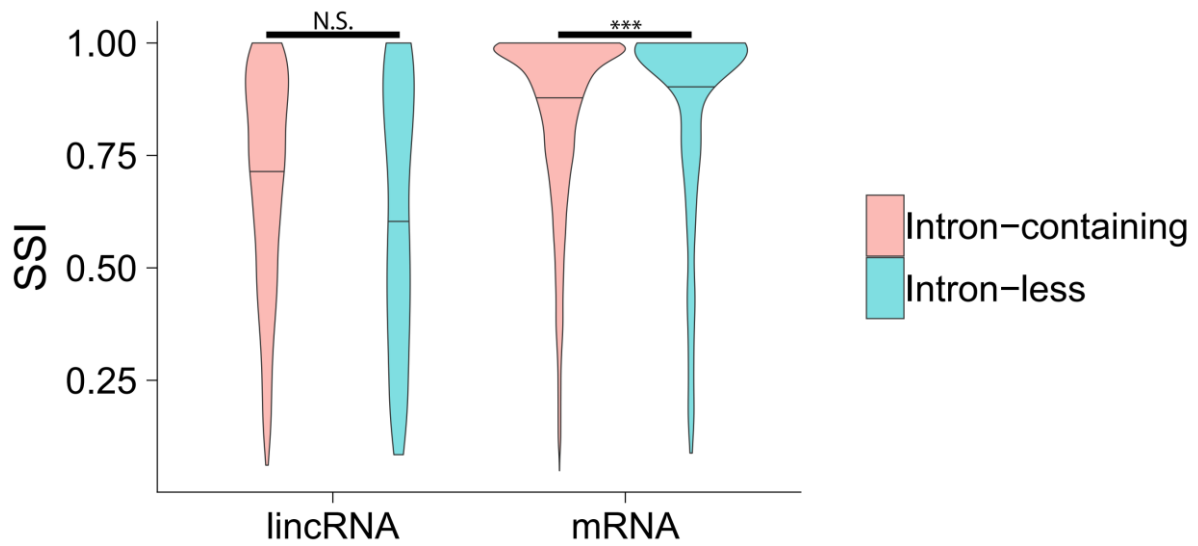

**Supplemental Figure 23. Sequence Stability Index of intron-containing versus intron-less genes.** Results are shown for protein-coding mRNAs (intron-containing:  $n=10728$ ; intron-less:  $n=179$ ) and lincRNAs (intron-containing:  $n=989$ ; intron-less:  $n=136$ ). \*  $p<0.01$ ; \*\*  $p<0.001$ ; \*\*\*  $p<0.0001$ , Mann-Whitney U test.

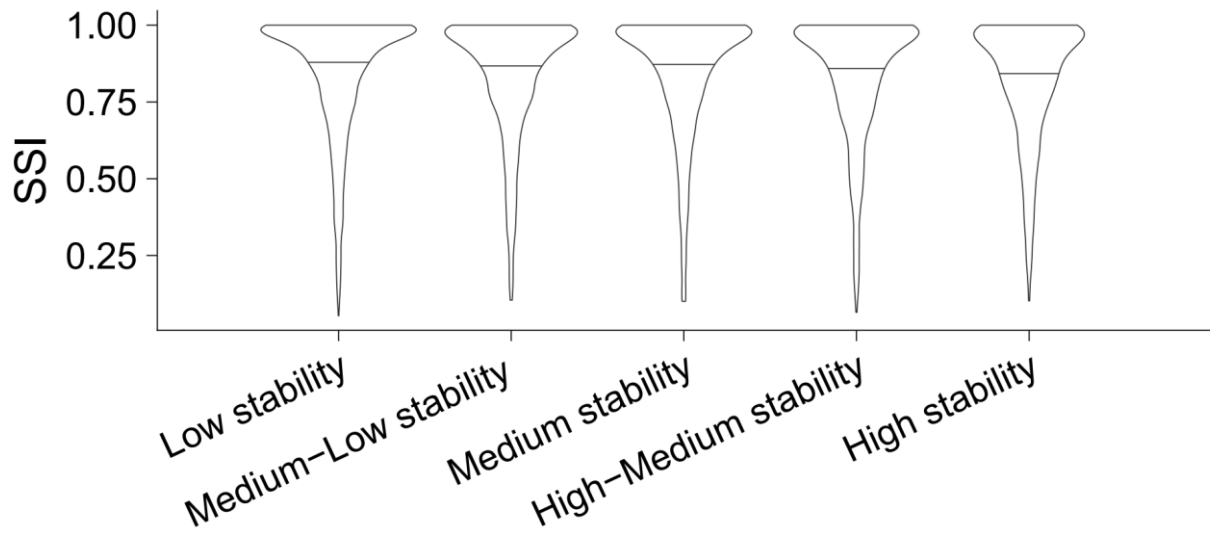

**Supplemental Figure 24. Sequence Stability Index (SSI) for mRNAs of various stability classes.** Each category represents a decile ranging from lowest stability to highest stability, based on the estimated half-lives.



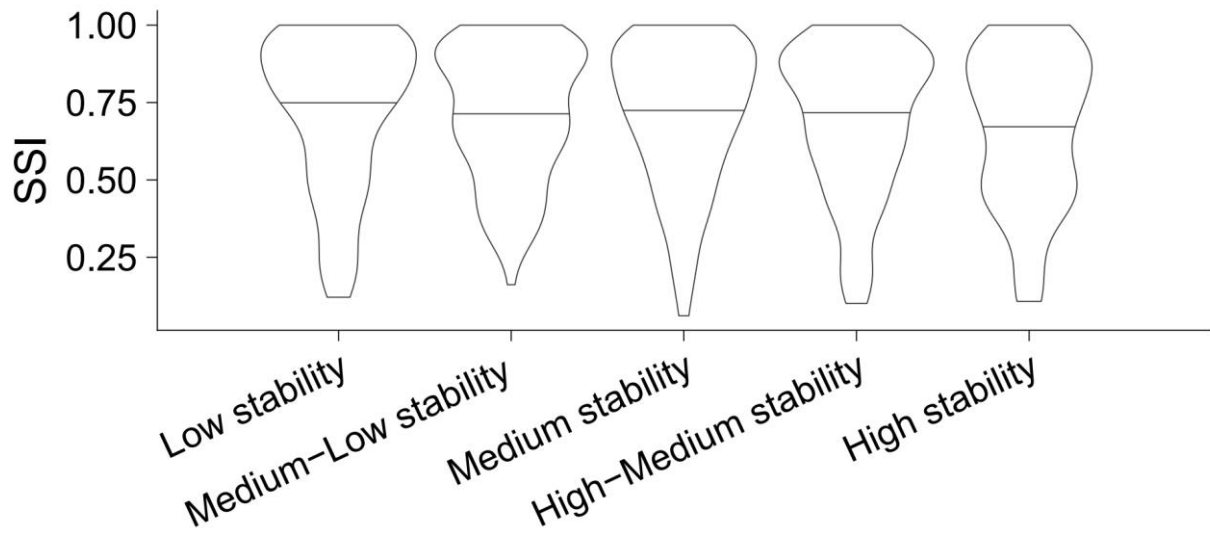

**Supplemental Figure 25. Sequence Stability Index (SSI) for lincRNAs of various stability classes.** Each category represents a quintile ranging from lowest stability to highest stability, based on the estimated half-lives.

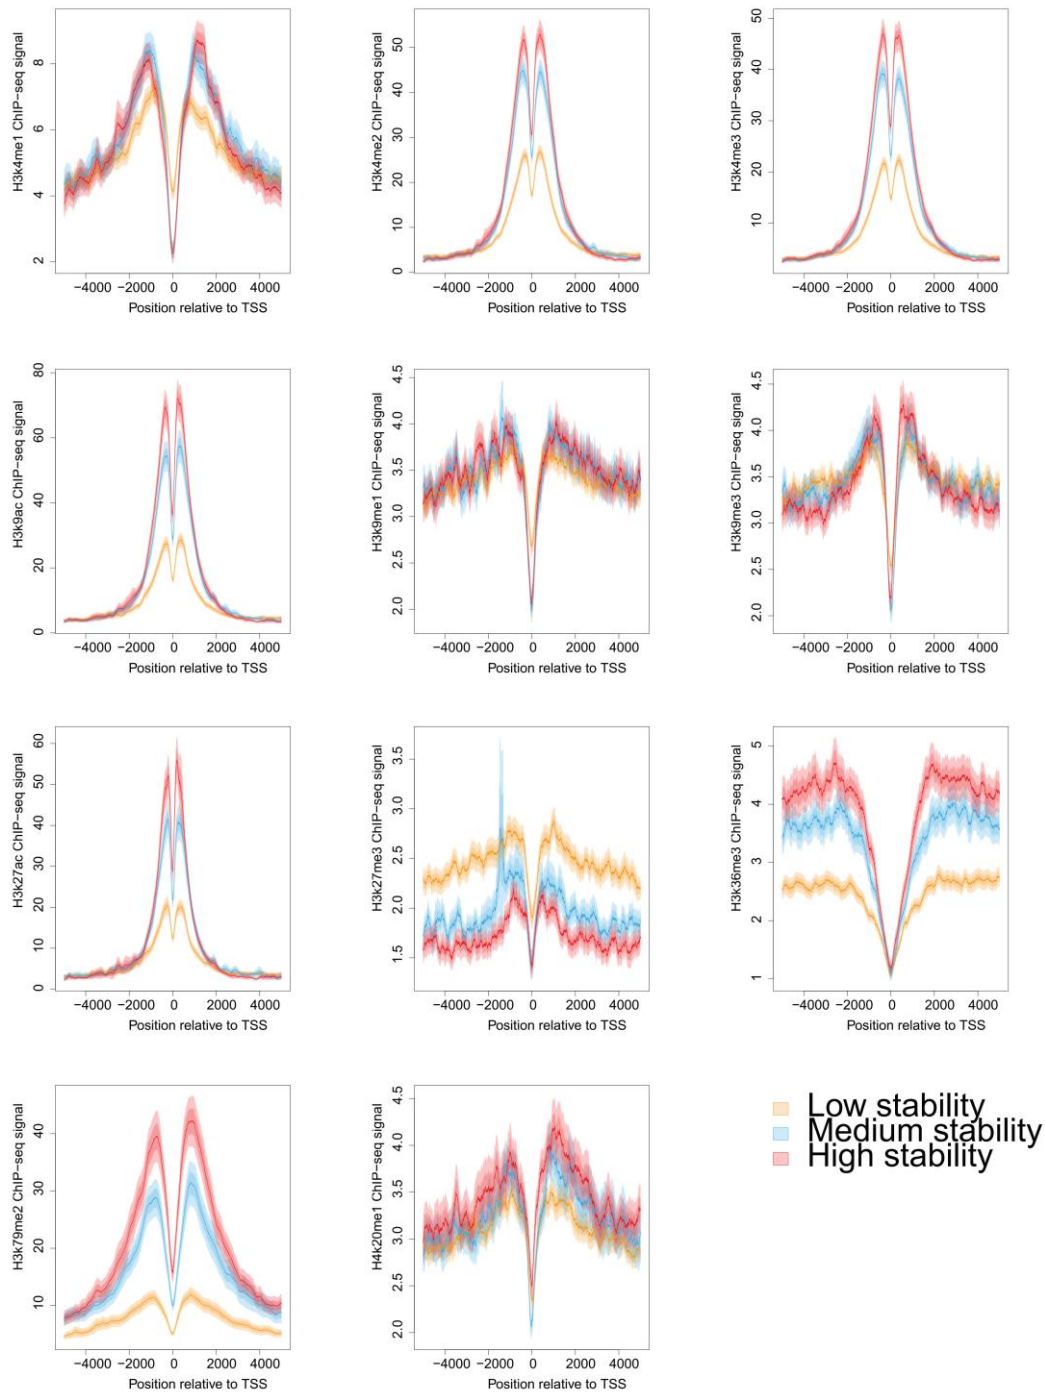

**Supplemental Figure 26. Histone modification signals for protein-coding mRNAs of various stability classes.** 11 different histone-modifications are shown. In each panel, separate plots are shown for mRNAs in three stability classes: Low stability (lowest 20% by estimated half-life); Medium stability (40%-60%); and High stability (highest 20%). These results are based on the previously published data (see **Methods**); see **Supplementary Figure 27** for similar results based on newly collected PRO-seq and RNA-seq data.

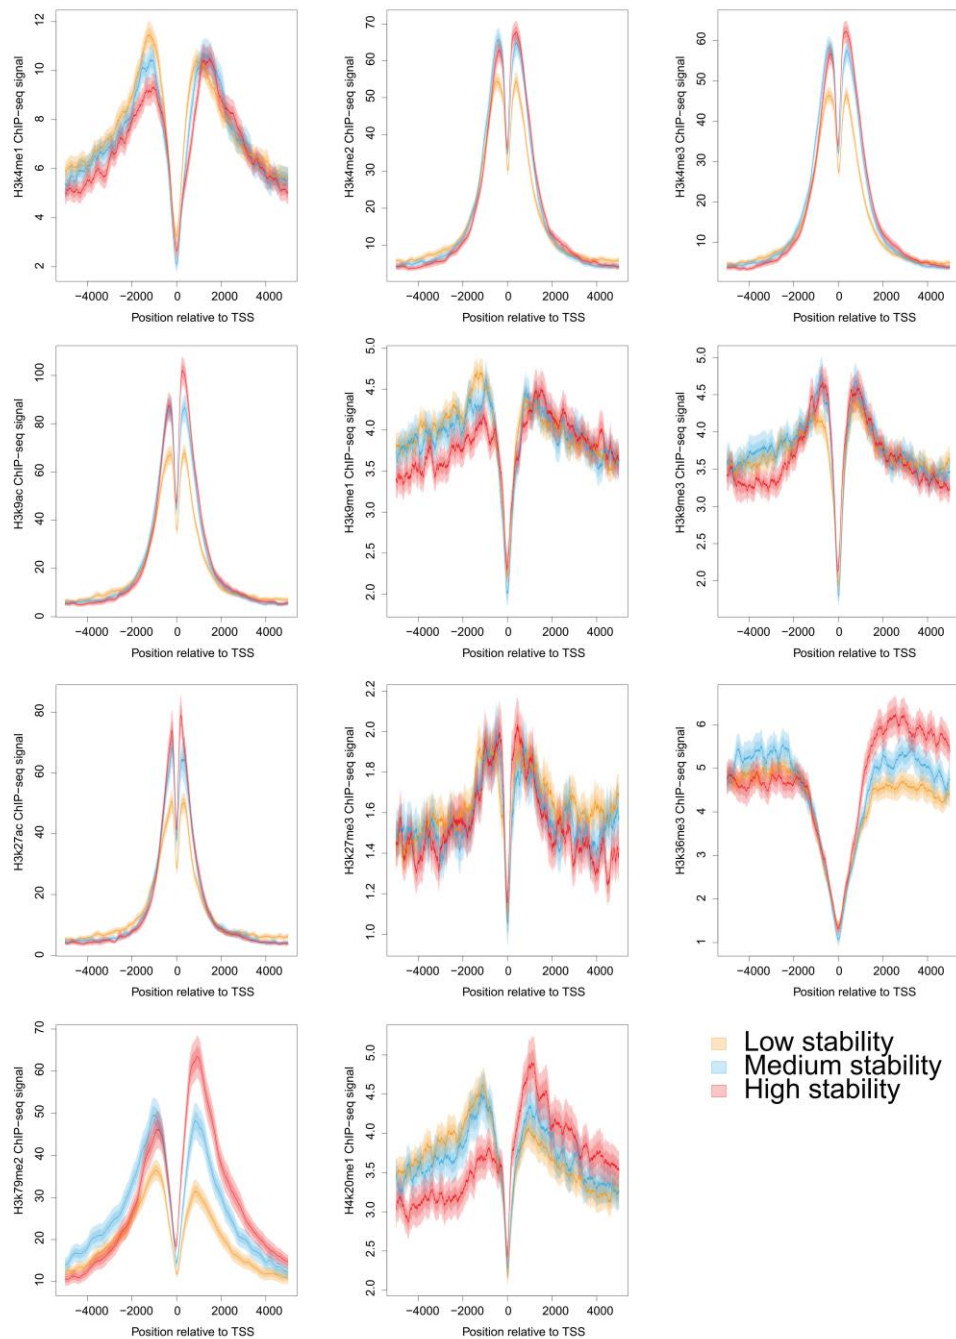

**Supplemental Figure 27. Histone modification signals for protein-coding mRNAs of various stability classes, based on newly collected data for this study (cf. Supplementary Figure 26).** 11 different histone-modifications are shown. In each panel, separate plots are shown for mRNAs in three stability classes: Low stability (lowest 20% by estimated half-life); Medium stability (40%-60%); and High stability (highest 20%).

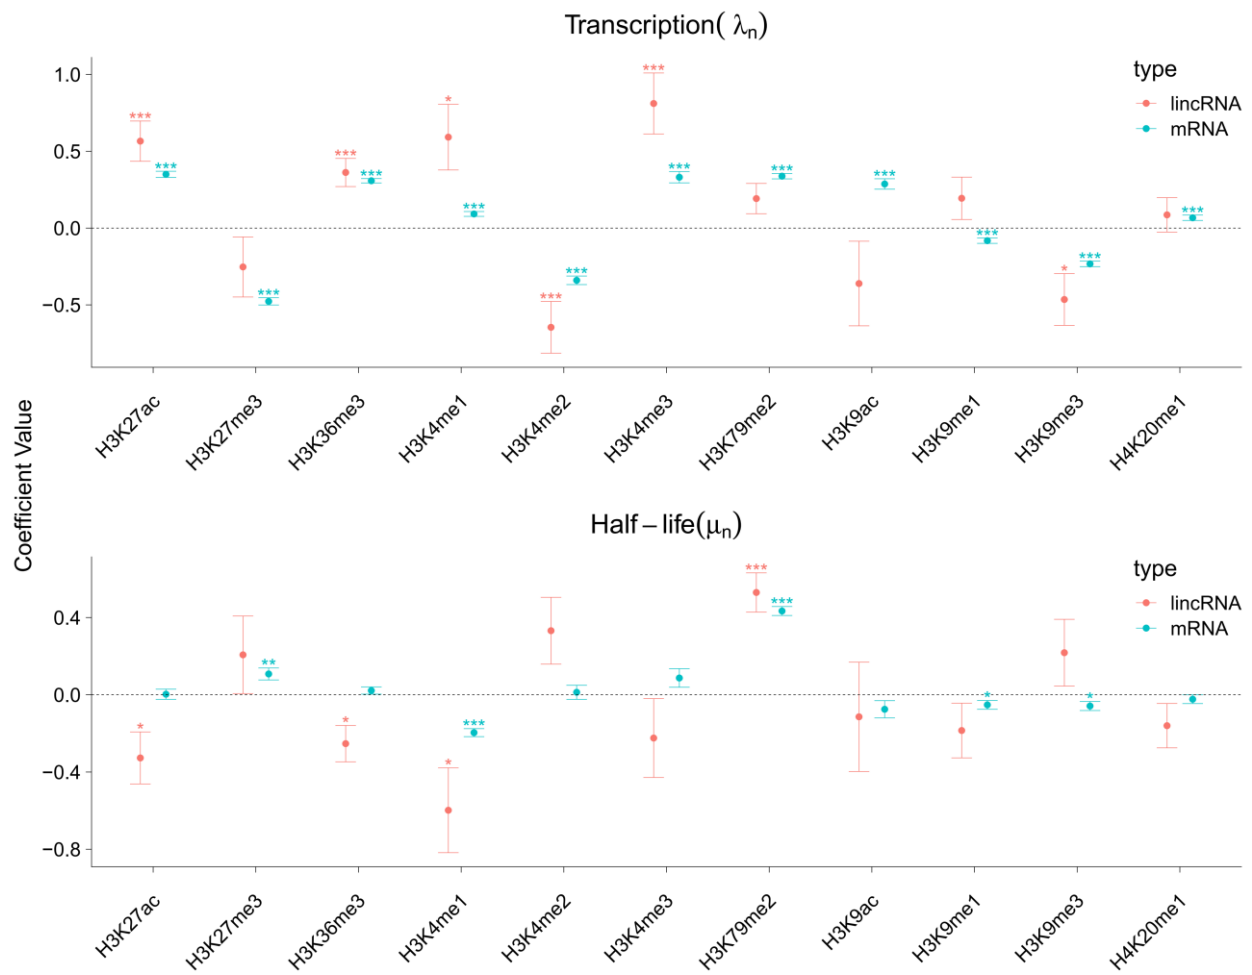

**Supplemental Figure 28. Estimated SEM coefficients for transcription ( $\lambda_n$ ; top) and half-life ( $\mu_n$ ; bottom) for 11 histone modifications.** It's assayed by ChIP-seq in the 500 bases immediately downstream of the TSS. The entire set of genes of each type was analyzed. Error bars and significance are as in **Fig. 3B**

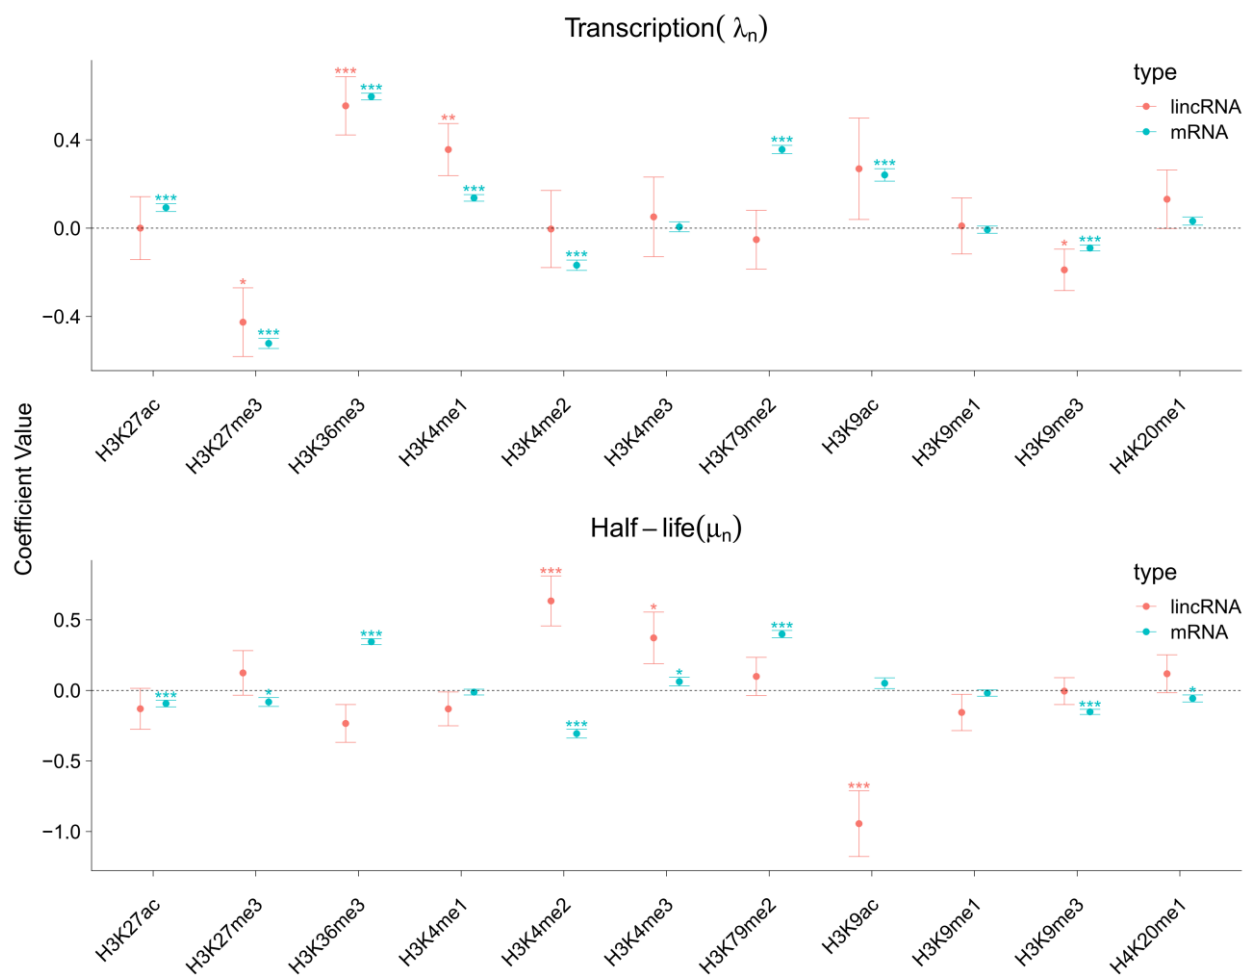

**Supplemental Figure 29. Estimated SEM coefficients for transcription ( $\lambda_n$ ; top) and half-life ( $\mu_n$ ; bottom) for 11 histone modifications.** It's assayed by ChIP-seq in the 1000-1500 bases downstream of the TSS. The entire set of genes of each type was analyzed. Error bars and significance are as in **Fig. 3B**

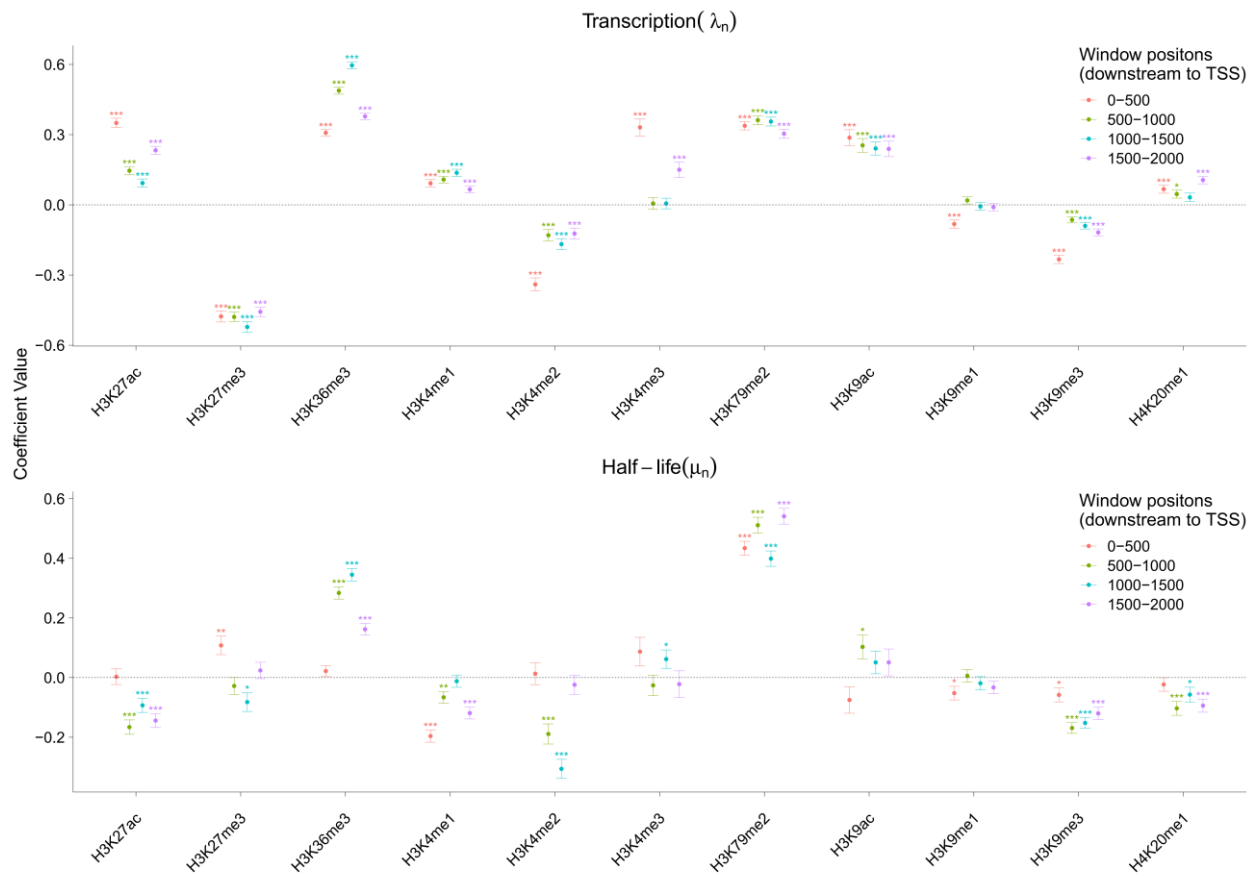

**Supplemental Figure 30. Estimated SEM coefficients for transcription ( $\lambda_n$ ; top) and half-life ( $\mu_n$ ; bottom) for 11 histone modifications.** It's assayed by ChIP-seq in 4 windows, each of 500 bases downstream of the TSS (0-500, 500-1000, 1000-1500, 1500-2000, represented by colors). The entire set of mRNA genes was analyzed. Error bars and significance are as in **Fig. 3B**. These results are based on the previously published data (see **Methods**); see **Supplementary Figure 31** for similar results based on newly collected PRO-seq and RNA-seq data.

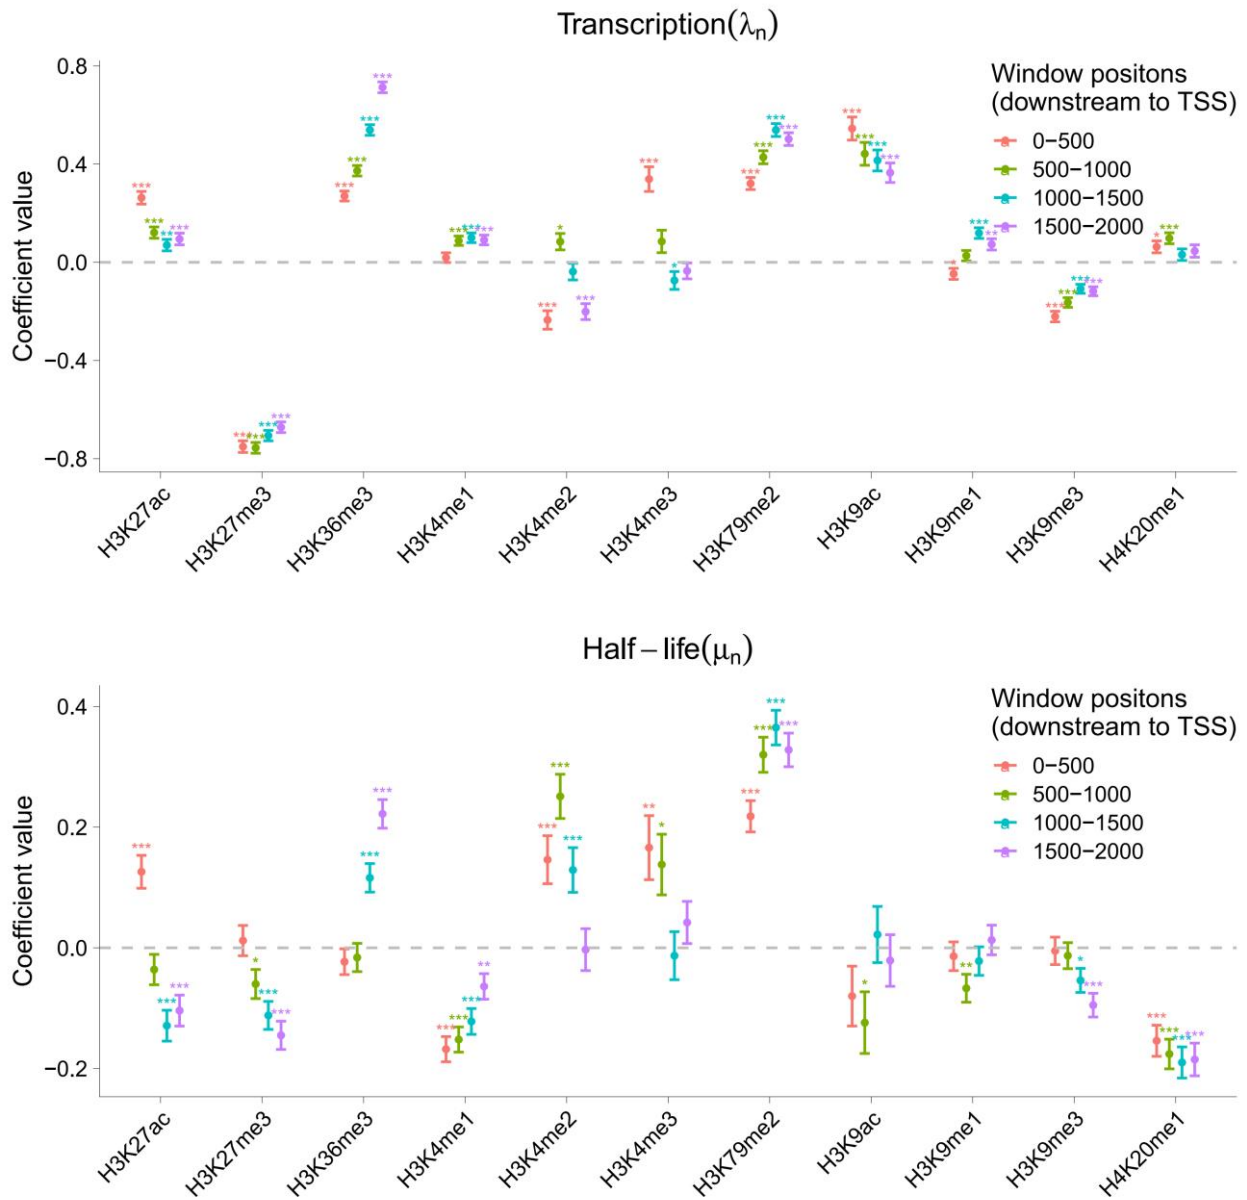

**Supplemental Figure 31. Estimated SEM coefficients for transcription ( $\lambda_n$ ; top) and half-life ( $\mu_n$ ; bottom) for 11 histone modifications.** It's assayed by ChIP-seq in 4 windows, each of 500 bases downstream of the TSS (0-500, 500-1000, 1000-1500, 1500-2000, represented by colors). The entire set of mRNA genes was analyzed. Error bars and significance are as in **Fig. 3B**. The analysis is the same as in **Supplemental Figure 30**, but based on newly collected data for this study.
